# Supplementary material
Source: HighWire-hosted journal article supplement (https://www.cmajopen.ca/highwire/filestream/81023/field_highwire_adjunct_files/1/open-2016-0145-2-at.pdf)
Supplement: open-2016-0145-2-at.pdf [file open-2016-0145-2-at.pdf]

Appendix 2 (as provided by the authors): Expanded diagnostic clusters used as drug-class specific indications of potential need

|                         |                                               |
|-------------------------|-----------------------------------------------|
| Antihypertensives       |                                               |
|                         | CAR14: Hypertension, w/o major complications  |
|                         | CAR15: Hypertension, with major complications |
|                         | CAR01: cardiovascular signs and symptoms      |
|                         | CAR03: Ischemic heart disease                 |
|                         | CAR05: Congestive heart failure               |
|                         | CAR07: Cardiomyopathy                         |
|                         | CAR10: Generalized atherosclerosis            |
|                         | CAR12: Acute myocardial infarction            |
|                         | END06: Type 2 diabetes, w/o complication      |
|                         | END07: Type 2 diabetes, w/ complication       |
|                         | END08: Type 1 diabetes, w/o complication      |
|                         | END09: Type 1 diabetes, w/ complication       |
| Cholesterol medications |                                               |
|                         | CAR11: Disorders of lipid metabolism          |
|                         | CAR12: Acute myocardial infarction            |
|                         | CAR03: Ischemic heart disease                 |
|                         | NUR05: Cerebrovascular disease                |
|                         | CAR10: Generalized atherosclerosis            |
